# Supplementary material for: Brain-Derived Neurotrophic Factor in Patients with Huntington's Disease
Source: PLoS One. 2011 Aug 12;6(8):e22966. doi: 10.1371/journal.pone.0022966 (PMC3155522; doi:10.1371/journal.pone.0022966)
Supplement: Table S1 — Selection of papers about BDNF measure in serum in different pathological conditions. (XLS) [file pone.0022966.s003.xls]

## Sheet: Foglio1
Table S1. Selection of papers about BDNF measure in serum in different pathological conditions.
Author/Publication	Disease	Subjects	Criteria of patient's selection	Information reported about blood collection	Information reported about procedure to obtain serum	Conservation	Assay Kit	BDNF range in controls	Statistical analysis	Results
Ciammola/American Journal of Medical Genetics Part B 144:574-577 (2007).	Huntington's disease	NC 42 PT 42	NC had no medical or psychiatric diagnosis, current infections or altered hemochrome values. PT had no history of appreciable changes in the sleep-wake cycle. For neurological assessment the UHDRS was used.	Blood was collected between 8:00 and 11:00 AM. To minimize the possible influence on serum BDNF concentrations of patients' cyrcadian rhytms, in a subgroup of 10 patients and 10 control subjects, samples were collected between 5:00 and 7:00 PM.	Blood was centrifuged at room temperature for 10 minutes at 3500xg.	-80°C	ELISA Promega	13120-39278 pg/ml	Tukey test ANOVA	The mean BDNF serum concentration was significantly lower in patients with HD (14876±6672 pg/ml) than in healthy controls (27103±6618 pg/ml). Lower BDNF levels were associated with longer CAG repeat length and a longer duration of illness.
Squitieri/European Journal of Nuclear Medicine and Molecular Imaging 36:1113-1120 (2009).	Huntington's disease	PT 23, 11 treated with riluzole 12 treated with placebo	For neurological assessment the UHDRS was used.	Blood was collected between 8:00 and 11:00 AM.	Blood was centrifuged at room temperature for 10 minutes at 3500xg.	-80°C	ELISA Promega	25-27 ng/ml	T-test	BDNF serum levels were significantly higher in patients treated with riluzole than in placebo-treated patients.
Laske/Journal of Neural Trasmission 113:1217-1224 (2006).	Alzheimer disease	NC 10 PT 30	The severity of dementia was assessed by Mini-Mental State examination:NC MMSE>27. Early stage MMSE >21 Later stage MMSE <21.	Blood was collected in anticoagulant-free tubes between 8:00 and 9:00 AM. Tubes were immediately immersed in melting ice.	Blood was centrifuged within 30 minutes after gaining.	-18°C	ELISA R&D systems	15.5-25.9 ng/ml	Two-tailed t-test Kendall-Tau-b-test	Patients with early stages of AD have increased BDNF serum concentration (25.1±4.1 ng/ml) as compared to more severe stages of AD (17±4.4 ng/ml) and healthy controls (20.7±5.2 ng/ml).
Laske/Journal of Psychiatric Research 41:387-394 (2007).	Alzheimer disease	NC 28 PT 27	NC had no organic brain disorders, MMSE score>27. AD patients met the diagnostic criteria of probable AD according to DSM-4,ICD-10 and NINCDS-ADRDA.	Blood was collected in anticoagulant free-tubes between 8:00 and 9:00 AM. Tubes were immediately immersed in melting ice.	Blood was centrifuged within 30 minutes after gaining.	-18°C	ELISA R&D systems	18-25 ng/ml	Two-tailed t-test Kendall-Tau-b-test	In AD patients a significantly decrease BDNF serum concentrations (18.6 ng/ml) was found as compared to healty controls (21.3 ng/ml).
Yasutake/European Archives of Psychiatry and Clinical Neuroscience 256:402-406 (2006).	Alzheimer disease	NC 33 PT 60	NC had no psychiatric or neurological antecedents. AD patients were diagnosed based on NINCDS-ADRDA.	Blood was collected in fasting condition between 6:30 and 7:30 AM.	NOT REPORTED	NOT REPORTED	ELISA R&D systems	12.19-27.25 ng/ml	Student's t-test Pearson's correlation coefficient	The serum BDNF levels in AD patients (14.73±5.88 ng/ml) were lower than those in normal control subjects (19.72±7.53 ng/ml).
O'Bryant/Dementia and Geriatric Cognitive Disorders 31:31-36 (2011).	Alzheimer disease	NC 201 PT 198	AD patients were recruited and tested according to Texas Alzheimer's Research Consortium. AD patients were diagnosed based on NINCDS-ADRDA.	Nonfasting blood samples were collected in serum-separating tubes during clinical evaluations, allowed to clot at room temperature for 1 h.	NOT REPORTED	-80°C	BDNF assay set up by Rules-Based Medicine, Austin, Texas, USA	2.10-43 ng/ml	NOT REPORTED	The mean serum BDNF levels were not significantly different between AD cases (31.46±9.10 ng/ml) and normal controls (30.96±8.82 ng/ml). In the AD group the BDNF levels were significantly negatively associated with the scores on immediate and delayed verbal memory and immediate visual memory.
Leyhe/European Archives of Psychiatry and Clinical Neuroscience 258:124-128 (2008).	Alzheimer disease	NC 20 PT 19	NC had no organic brain disorders and MMSE score > 27. AD patients had no treatment with antidepressants, nonsteroidal antiphlogistics or statins. AD patients met the diagnostic criteria of probable AD according to DSM-4,ICD-10 and NINCDS-ADRDA.	Blood was collected into serum tubes between 8:00 and 9:00 AM. Tubes were immediately immersed in melting ice.	Blood was centrifuged within 30 minutes after gaining.	-18°C	ELISA R&D systems	17.2-29.20 ng/ml	Fisher's test Two-tailed t-test	In AD patients there is a decrease of BDNF serum concentrations (19.2±3.7 ng/ml) as compared to healthy controls (23.2±6.0 ng/ml). After 15 months of treatment with Donepezil the BDNF serum concentration increased significantly in AD patients, showing no more difference to the healthy controls (23.6±7.0 ng/ml).
Ricci/Journal of Clinical Psychopharmacology 30:751-752 (2010).	Parkinson disease	NC 14 PT 46	Neurological evaluation of PD patients was conducted during the ON-state and included the Hoehn and Yahr Scale and UPDRS, motor part III. Patients were excluded if they had a history of seizures, major head trauma, dementia, previous neurological surgery or psychotic symptoms, alcohol abuse or dependence and addiction to drugs. Depression was diagnosed according to Diagnostic and Statistical Manu…	NOT REPORTED	Blood was centrifuged within 20 minutes after sampling at 2000xg.	-80°C	ELISA R&D systems	NOT REPORTED	Univariate analyses of variance followed by Fisher's test	PD patients are characterized by a reduction in BDNF serum levels. Depression may exacerbate this effect and worsen PD symptoms. SSRIs treatment increased BDNF serum levels in PD patients and ameliorate motor functions.
Scalzo/The Journal of Neurology 257:540-545 (2010).	Parkinson disease	NC 23 PT 47	For the PD group, inclusion criteria were PD diagnosis and the ability to walk independently. The exclusion criteria were the presence of dementia, delirium, a comorbid neurological or inflammatory disease or a history of neurosurgical procedure	Blood was collected in the morning prior to clinical assessment.	Blood was centrifuged at 1000xg for 10 minutes.	-20°C	ELISA R&D systems	626.9-12321.5 pg/ml	Student's t test or Mann-Whitney U test Pearson's correlation coefficient or Spearman's rank correlation coefficient	The serum BDNF level in PD patients (4061.6±2.374 pg/ml) were decreased with respects to controls ((5.662±3342.6 pg/ml). This reduction is more intence in the early stages of the disease. Serum levels of BDNF correlates with motor impairment. BDNF levels were not influenced by the presence of depression
Dias/Bipolar Disorders 11:663-671 (2009).	Bipolar disorder	NC 50 PT 65	Patients had no neurological disorders, previous head trauma, physical illnesses requiring medical intervention, stories of substance abuse or electroconvulsive therapy. The patient group was diagnosed according to DSM-IV criteria and with the Mini-International Neuropsychiatric Interview (MINI).	Blood was collected in anticoagulant-free vacuum tube.	Blood was immediately centrifuged for 5 minutes at 3000×g.	-80°C	ELISA Promega	NOT REPORTED.	Parametric t-test Chi-squared test Pearson's correlation coefficient Anova	No significant differences regarding serum BDNF levels in BD patients and healthy controls were found.
Tan/Neuroscience Letters 382:27-32 (2005).	Schizophrenia	NC 45 PT 81	Chinese patiens of cronic type clinically stable with duration of illness for at least 5 years, resistant to treatment, age between 25 and 60, in excellent phisical health. Patients met DSM-III-R criteria for schizophrenia.	Blood was collected between 7:00 and 9:00 AM.	Blood was centrifuged at room temperature for 15 minutes at 3500 rpm.	-70°C for maximum 1 month.	ELISA BanDing Biomedical, Inc.	5.6-14.2 ng/ml	Fisher's test Anova	Serum BDNF level was significantly decreased in patients with cronic schizophrenia (7.3±2.6 ng/ml) compared to the control group (9.9±4.3 ng/ml). A significant decrease in BDNF levels was observed in patients treated on long-term with both typical and atypical antipsichotics.
Huang/Journal of Psichiatry Research 40:664-668 (2006).	Schizophrenia	NC 96 PT 126	No systemic disease, no drugs for one week before being enrolled in this study. Patients met DSM-IV criteria for schizophrenia.	NOT REPORTED.	NOT REPORTED	NOT REPORTED	ELISA Promega	7.31-21.03 ng/ml	Anova Duncan's multiple range test	There were no significant differences in serum BDNF protein levels between schizophrenia patients and healthy control subjects.
Grillo/Journal of Psichiatry Research 41:31-35 (2007).	Schizophrenia	NC 25 PT 44	24 patients were on typical antipsychotics and 20 on clozapine, both groups being trated for at least 12 weeks. Schizophrenic patients met DSM-IV criteria.	Blood was collected in anticoagulant-free vacuntainer system between 10:00 and 12:00 AM.	Blood was centrifuged for 15 minutes at 2000xg.	-80°C for maximum 4 months.	ELISA kit Chemikine by Chemicon	143-195 pg/ml	Anova Duncan post-hoc test Student t-test Pearson's test	Normal controls showed higher levels of serum BDNF compared to the whole group of schizophrenic patients. Serum BDNF values for controls were 168.8±26,3 pg/ml, for the clozapine group were 125.4±44.5 pg/ml and for the group on typical antipsycothics were 101.3±51.6 pg/ml. BDNF values from patients on clozapine were no significantly higher than values from patients on typical antipsychotics.
Ikeda/Schizophrenia Research 101:58-66 (2008).	Schizophrenia	NC 87 PT 74	Normal controls have no history of psychiatric disorders. Patients have been receiving antipsychotic drugs. Patients met the DSM-IV criteria for schizofrenia.	Blood was collected in anticoagulant free-tubes between 10:00 and 16:00.	Blood was allowed to clot at room temperature and then was centrifuged for 7 minutes at 3000 rpm.	-80°C	NOT REPORTED	26.9-77.5 ng/ml	Mann-Whitney U-test Spearman rank correlation coefficient	The mean serum BDNF level of patients (37.1±20.4 ng/ml) was significantly lower than that of normal controls (52.2±25.3 ng/ml).
Gama/Neuroscience Letters 420:45-48 (2007).	Schizophrenia and bipolar disorder	NC 26 SZ 60 BD 30	Normal controls had no current, past history or first degree family history of a major psichiatric disorder, dementia or mental retardation. Schizophrenic patients were on chronic medication, had a clinical global impression score <3. None of them had a psychiatric hospitalization for the last 5 years. 27 were taking Clozapine, 14 typical antipsychotics, 19 other atypical antipsychotics. In bipol…	Blood was collected in anticoagulants free-tubes.	Blood was centrifuged for 5 minutes at 3000 rpm.	-70°C	ELISA Chemicon	0.11-0.27 pg BDNF/ug protein	Student t-test Anova Tukey test	Serum BDNF levels were significantly higher in schizophrenic patients when compared to normal controls or euthymic bipolar disorder patients.
Reis/Neuroscience Letters 439:157-159 (2008).	Schizophrenia	NC 20 PT 40	All men patients, mean age 52,3. Patients met the DSM-IV criteria for schizophrenia. The clinical state of the patients was assessed using the BPRS, the PANNS and the AIMS.	NOT REPORTED.	NOT REPORTED	-70°C .	ELISA R&D systems	2259-6351 pg/ml	Mann-Whitney U-test	Schizophrenic patients had significantly higher serum concentration of BDNF (7751±1847 pg/ml) in comparison to normal controls (4305±2046 pg/ml).
Carlino/Journal of Psychiatric Research 45:273-279 (2010).	Schizophrenia	NC 40 PT 40	PT were caucasians diagnosed of schizophrenia according to DSM version 1. Psychiatric symptoms were rated using PANSS. PT were treated with antipsychotics, antiparkinsonian drugs. Antibiotics, anti-hypertensives and gastro-protectors, but not anticoagulants. Antidepressants and mood stabilizers were not used. PT with a history of substance or alcohol abuse, personality disorder, medical or neurol…	Blood was collected between 8:00 and 9:00 in anticoagulant free tubes. Blood samples were maintained at RT for 1 h, followed by 1 h at 4°C.	Blood was centrifuged at 2000xg for 10 minutes at 4°C.	-20°C	ELISA Promega	22.0-32.1 ng/ml	Mann-Whitney U-test	Schizophrenic patients showed a slightly lower mean serum concentration of BDNF compared to controls, with overlapping range of values between the two populations.
Rizos/Progress in Neuro-Psycopharmacology & Biological Psychiatry 32: 1308-1311 (2008) .	Schizophrenia	NC 15 PT 14	Drug-naive patients, mean age 25.4. Patients were assessed by SCID-IV and by PANSS.	Blood was collected in Vacutainer tubes.	Blood was allowed to clot for 30 minutes and then was centrifuged at 15°C for 15 minutes at 3500 rpm.	-20°C	ELISA R&D systems	21.57-38.43 ng/ml	ANOVA Pearson correlation coefficient	Serum BDNF levels of schizophrenic patients were significantly reduced compared to normal controls.
Karege/Psychiatry Research 109:143-148 (2002).	Depression	NC 30 PT 30	Patients had no history of mental disorder, neurological disease or drug abuse.	Blood was collected in anticoagulant-free tubes.	Blood was allowed to clot at room temperature for 1 hour, followed by 1 hour at 4°C (for platelets activation). Blood was centrifuged at 4°C for 10 minutes at 2000xg.	-20°C for maximum 1 month.	ELISA Kit Catalys AG	15.1-44.6 ng/ml	Student t-test	Serum BDNF levels in patiens was lower (22.6±3 ng/ml) than in normal controls (26.5±7 ng/ml).
Schimizu/Biological Psychiatry 54:70-75 (2003).	Depression	NC 50 Antidepressant-naive PT 16 Antidepressant-treated PT 17	Antidepressant-naive patients included had been diagnosed with a single episode of MDD and had never received treatment with any type of antidepressant before. Antidepressant-treated patients had suffered from 1 to 3 depressive episodes of MDD and had received antidepressant for a minimum period of 3 weeks.	Blood was collected between 11:00 and 12:00 AM.	NOT REPORTED	-80°C	ELISA Promega	16.3-39.1 ng/ml	F test Chi-squared test Student t-test Anova	Serum BDNF levels in antidepressant-naive patients with depression were significantly lower (17.6 ng/ml) than those in treated patients (30.6 ng/ml) or in normal controls (27.7 ng/ml).
Gonul/European Archives of Psychiatry and Clinical Neuroscience 255:381-386 (2005).	Depression	NC 18 PT 28	Patients had no organic brain disorders, history of substance abuse, physical illness. The mean-age of patients included in the study was 35,5 years and the duration of the current depressive episode was 13,1 weeks.	Blood was collected in anticoagulant-free tubes between 11:00 and 12:00 AM.	Blood was allowed to clot at room temperature for 1 hour followed by 1 hour at 4°C.	-70°C	ELISA Promega	17.5-36.1 ng/dl	Chi-squared test Student's t-test Mann-Whitney U-test Pearson's correlation coefficient	BDNF levels of depressed patients were significantly lower (20.8±6.7 ng/dl) than those of normal controls (26.8±9.3 ng/dl), with the magnitude of the difference corresponding to the magnitude of the depression. After treatment the BDNF increased to normal control levels (33.3±9.89 ng/dl).
Karege/Biological Psychiatry 57:1068-1072 (2005).	Depression	NC 35 PT 43	Normal controls had no history of mental disorders, neurological disease or drug abuse. Patients met DSM-IV criteria for major depression.	Blood was collected in anticoagulant-free tubes.	Blood was allowed to clot at room temperature for 1 hour followed by 1 hour at 4°C. Blood was centrifuged at 4°C for 10 minutes at 2000xg.	-20°C	ELISA Promega	10.2-14.2 ng/ml	Student t-tests Regression analysis	BDNF levels of depressed patients were lower (10.07±2 ng/ml) than those of normal controls (12.2±2 ng/ml). Serum BDNF levels were negatively correlated with the severity of depression.
Piccinni/Journal of Affective Disorders 105:279-283 (2008).	Depression	NC 15 PT 15	Depressed patients were diagnosed according to Diagnostic and Statistical Manual from Mental Disorders.	Blood was collected between 9:00 and 10:00 AM.	NOT REPORTED	-20°C	ELISA Promega	25.6-41.6 ng/ml	Friedman test Post-hoc Dunnet analysis Spearman's correlation coefficient	At baseline, patients'serum and plasma BDNF level (19300±8800 pg/ml) were significantly lower than those found in normal controls (33600±8600 pg/ml). However, while from the 1st month of treatment patients'plasma BDNF levels did not differ significantly from those observed in healthy control subjects, serum BDNF levels in patients remained significantly lower at all times.
Matrisciano/Journal of Psichiatric Research 43:247-254 (2009).	Depression	NC 20 PT 21	All partecipants were evaluated by two espert psychiatrics. Study subject did not receive any antidepressant or antipsychotic treatment for at least a month prior the onset of the treatment.	Blood was collected in anticoagulant-free tubes between 10:00 and 12:00 AM.	Blood was allowed to clot at room temperature for 1 hour followed by 1 hour at 4°C. Blood was centrifuged at 4°C for 10 minutes at 2000xg.	-20°C	ELISA Promega	51.0-77.2 ng/ml	Kruskal-Wallis test and Wlicoxon rank-sum test	BDNF levels in serum were significantly lower in depressed patients at baseline (35.4±15.2 ng/ml) relative to normal controls (64.1±13.1 ng/ml).There was a significant increase in BDNF serum levels after 5 weeks of treatment with sertraline (50.6±14.2 ng/ml) and after 6 months of Venlafaxine (54.9±12.2 ng/ml). Escitalopram did not affect BDNF levels at either time point.
Monteleone/Bipolar Disorders 10:95-100 (2008).	Depression and bipolar disorders	NC 22 PT 63	Depressed patients had been treated in the past with antidepressant drugs. Euthymic patients had received different combination of mood stabilizers, antidepressant, benzodiazepines and atypical antipsychotics.	Blood was collected between 8:00 and 9:00 AM.	Blood was allowed to clot at room temperature.	-80°C	ELISA Promega	30-42 ng/ml	Anova Post-hoc Tukey's test Pearson's correlation test	Compared to healthy controls, serum BDNF concentration was significantly reduced in all patient groups with no significant difference among them. Drug treatments had no effect on lowered circulating BDNF levels in patients.
Basterzi/Progress in Neuro-Psychopharmacology and Biological Psychiatry 33:281-285 (2009).	Depression	NC 15 22 PT treated with fluoxetin(FLX) 21 PT treated with venlafaxine(VEN)	Normal controls had no axis I or axis II DSM-IV diagnosis, current pregnancy, acute or chronic infections, autoimmune, allergic, neoplastic or endocrine diseases and other acute physical disorders, including surgery or infarction of the heart or brain. Patients were no exposed to any drug including antidepressants, non-steroidal anti-inflammatory drugs and oral contraceptives in the past 4 weeks.	Blood was collected between 08:00 and 10:00 AM.	Blood was centrifuged at 4°C for 15 minutes at 3000 rpm.	-80°C	ELISA R&D systems	40029-55425 pg/ml	Independent t-test One-way Anova Paired t-test	Serum BDNF levels of depressed patients did not show any significant differences when compared to normal controls. BDNF levels of the patient group did not change with treatment.
Bocchio-Chiavetto/The World Journal of Biological Psychiatry 11:763-773 (2010).	Depression	NC 59 PT 25	Depressed patients included in the study were assessed by interview using the Schedules for Clinical Assessment in Neuropsychiatry, as having depression as defined by the ICD-10 or DSM-IV. The Montgomery-Asberg Depression Rating Scale was administered at the baseline to assess severity of illness. Only treatment with benzodiazepines was allowed. The normal controls are a group of volunteeres with…	Blood was collected between 8:00 and 9:00 AM in in anticoagulant-free tubes after overnight fast.	Serum tubes were kept at RT for 2 h follwed by 1 h at 4°C before serum preparation by centrifugation (3000 rpm for 15 minutes).	-80°C	A R&D systems	20-80 ng/ml	Student t test	In depressed patiens BDNF was significantly lower (29.60±12.41 ng/ml) with respect to controls (42.59±4.39 ng/ml).
Angelucci/Journal of Psycopharmacology 21:820-825 (2007).	Chronic heroin and cocaine abuse	NC 15 Heroin- users 15 Cocain users 15	Cocaine addicted patients:age range 23-41; period of the drug use 10.8±5.1 years; average daily dose 3±1.73 g. Heroin addicted patients:age range 19-41; period of the drug use 5.69±2. 8 years; average daily dose 1.246±0.78g. Patients were excluded from the study if they were seropositive for HIV or if they had neurological disorders or head trauma with loss of consciousness for more than 30 min. …	Blood was collected in anticoagulant-free tubes.	Blood was centrifuged within 20 minutes after sampling, for 20 minutes at 2000xg.	-80°C	ELISA R&D systems	5331-5534 pg/ml	Anova Newman-Keuls's test	Heroin addicted patients had reduced BDNF levels as compared to those of normal controls. The concentration of BDNF in cocaine patients did not significantly differ from controls.
Monteleone/Psycosomatic Medicine 66:744-748 (2004).	Anorexia nervosa and obesity	NC 27 AN 22 OB 24	Normal controls were non obese drug-free control women having a BMI<25 Kg/m2. Patients were all women. Patients suffered from obesity have a body mass index>30 Kg/m2. The diagnosis of anorexia nervosa was made by a trained interviewer using the Structured Clinical Interview for DSM-IV axis I disorders.	Blood was collected between 8:00 and 9:00 AM in fasting condition.	Blood was allowed to clot at room temperature.	-80°C	ELISA Promega	40-50 ng/ml	Anova Mann-Whitney U-test Spearman rank order correlation test	In drug-free patients with anorexia, serum BDNF levels were significantly lower (27 ng/ml) than in normal controls (45 ng/ml), whereas in drug-free women with obesity they were significantly enhanced (87 ng/ml).
Han/The New England Journal of Medicine 359:918-927 (2008).	Obesity in the WAGR Syndrome	PT 33	19 patients had BDNF haploinsufficiency: 17 had heterozygous complete deletion of BDNF and 2 had heterozygous deletion of a portion of BDNF.	Blood was collected in fasting condition in Vacuette® (Greiner Bio-One, Kremsmuenster, Austria) serum separator tubes with silica clot activator.	Blood was allowed to clot for 30 minutes before centrifugation.	-80°C for maximum 14 months.	ELISA Promega	1-85 ng/ml	Kolmogorov-Smirnov test Indipendent-sample t-test Fisher's exact test	BDNF haploinsufficiency is associated with lower levels of serum BDNF and with childhood-onset obesity.
