# Supplementary material for: Brain-Derived Neurotrophic Factor in Patients with Huntington's Disease
Source: PLoS One. 2011 Aug 12;6(8):e22966. doi: 10.1371/journal.pone.0022966 (PMC3155522; doi:10.1371/journal.pone.0022966)
Supplement: Table S2 — Selection of papers about BDNF measure in plasma in different pathological conditions. (XLS) [file pone.0022966.s004.xls]

## Sheet: Foglio1
Table S2. Selection of papers about BDNF measure in plasma in different pathological conditions.
Author/Publication	Disease	Subjects	Criteria of patient's selection	Information reported about blood collection	Information reported about procedure to obtain plasma	Conservation	Assay Kit	BDNF range in controls	Statistical analysis	Results
Bun-Hee Lee/Journal of Affective Disorders 101:239-44 (2007).	Depression	NC 95 PT 77	All patients met DSM-IV criteria for major depressive disease. They were medication free for at least 4 weeks.	Blood was collected between 8:00 and 9:00 AM in lithium heparin vacuum tube.	Blood was immediately centrifuged for 10 minutes at 3800 rpm.	-70°C	ELISA R&D Systems	472-1166 pg/ml	Two-tailed t-test Anova	Plasma BDNF levels were significantly lower in depressed patients (579.46±414.25 pg/ml) than in normal controls (819.2±347.05 pg/ml).
Yong-Ku Kim/Progress in Neuro-psychopharmacology & Biological Psychiatry 31:78-85 (2007).	Depression	NC 30 PT 64	32 major depressive disorders patients who had recently attempted suicide. 32 non-suicidal major depressive disorders patients.	For depressed and normal controls, blood was collected between 7:00 and 8:00 AM in lithium heparin vacuum tube.	NOT REPORTED	NOT REPORTED	ELISA R&D Systems	400-900 pg/ml	Pearson Chi-square Fisher's exact test Anova	BDNF levels were significantly lower in suicidal MDD patients (430.5±397.0 pg/ml) than non-suicidal MDD patients (875.80±663.02 pg/ml) or normal controls (889.4±611.3 pg/ml).
Piccinni/Journal of Affective Disorders 105:279-283 (2008).	Depression	NC 15 PT 15	Severity of depression was assessed using the Hamilton Rating Scale for depression and the Montgomery-Asberg depression rating scale. Age 36-57.	Blood was collected between 9:00 and 10:00 AM.	NOT REPORTED	-20°C	ELISA Promega	3100-7700 pg/ml	Mann-Whitney test Spearman's correlation coefficient	Plasma BDNF levels were significantly lower in depressive patients (2900±1900 pg/ml) than in normal controls (5400±2300 pg/ml). From the 1st month of treatment with antidepressant drugs patients'plasma BDNF levels did not differ significantly from those observed in normal controls.
Grassi Oliveira/Biological Psychiatry 64:281-285 (2008).	Depression	NC 15 Major Depressive Disorders patients (MDD) 17 MDD outpatients with Childhood Physical Neglect (CPN) 17	Females 20-55 years old. Patients had no axis I disorder, history of childhood maltreatment, clinical illness, neurological disorder, psychoactive substance use in the last 30 days.	Blood was collected in fasting condition between 8:00 and 9:00 AM.	Plasma was separated within 30 minutes.	-80°C for maximum 6 months.	ELISA R&D Systems	2500-10000 pg/ml	Kolmogorov-Smirnov test Anova	MDD patients showed lower plasma BDNF concentration (1000-5000 pg/ml) than normal controls (2500-10000 pg/ml). MDD+CPN patients had even lower BDNF levels (800-2500 pg/ml).
Gustafsson/Psychiatry Research 169:244-248 (2009).	Depression	NC 18 PT 18	Patients met moderate or severe major depressive diagnosis according to DSM-IV and score more than 21 on the Montgomery-Åsberg Depression Rating Scale (MADRS).	Blood was collected during the physical exercise.	Blood was kept on ice and centrifuged at 4°C for 10 minutes at 3000 rpm within 1 h of collection.	-70°C	ELISA Chemicon	223-1875 pg/ml	Non-parametric tests Friedman's test Wilcoxon sign rank test Spearman's rank test	There were no differences in BDNF levels in moderately depressed patients compared with normal controls during an incremental exercise test.
Piccinni/European Neuropsychopharmacology 19:349-355 (2009).	Depression	NC 15 PT 18	Subjects had a chronic (> 2 years) or recurrent major depressive episode. Patients unresponsive to tricyclic antidepressants (TCA) were subjected to ECT.	Blood was collected in fasting condition between 8:00 and 9:00 AM, into EDTA-coated tubes.	Blood was kept on ice and centrifuged at 4°C for 10 minutes at 2000×g.	-20°C	ELISA Promega	3.1-7.7 ng/ml	Kruskal–Wallis Mann–Whitney U-test	At T0 (baseline) plasma BDNF levels of patients were significantly lower than those of control subjects. At T2 (after ECT) plasma BDNF levels were significantly increased in parallel with the decrease of the Hamilton Rating Scale for Depression (HRSD) total score.
Dell'Osso/Progress in Neuro-Psychopharmacology and Biological Psychiatry 33:899-902 (2009).	Post-traumatic stress disorder	NC 18 PT 18	Subjects had no current or lifetime diagnosis of organic mental disorder, schizophrenia, schizophreniform or other psychotic disorders, bipolar disorders, substance-related disorders, a current diagnosis of depressive disorder, uncontrolled or severe medical conditions, and any current or past psychopharmacological treatment.	Blood was collected between 8:00 and 9:00 AM into EDTA-coated tubes.	Blood was kept on ice and centrifuged at 4°C for 10 minutes at 2000×g.	-20°C	ELISA Kit Promega	4-6 ng/ml	Anova Post-hoc Bonferroni test	BDNF levels were significantly lower in patients (5.3±1.1 ng/ml) than in normal controls (7.4±1.5 ng/ml).
Buckley/Schizophrenia Research 91:1-5 (2007).	First-episode psychosis	NC 14 PT 15	NC age 19-30 PT age 11-29. Never medicated FEP patients and diagnosed as schizophrenia or schizophreniform disorders during 6 months of hospitalization.	Blood was collected between 8:00 and 10:00 AM into EDTA vacuum tube.	Blood was centrifuged at 5°C for 10 minutes at 2500 rpm. Plasma was supplemented with 20 μg/ml aprotinin.	-70°C	ELISA R&D Systems	10-60 pg/ml	Student t-test Pearson's product moment test	BDNF contents were markedly lower in plasma of never-medicated FEP (17±3 pg/ml) as compared to normal subjects (49.1±6.7 pg/ml).
Keun-Ho Joe/ Alcoholism:Clinical and Experimental Research 31: 1833-1838 (2007).	Alcohol dependence	NC 75 PT 64	Age 23-46 BMI 20-26 Kg/m2. All patients met Diagnostic and Statistical Manual IV criteria for alcohol dependence.	Blood was collected between 8:00 and 9:00 AM into a heparin-coated tube.	Blood was immediately centrifuged for 10 minutes at 3800 rpm.	-70°C	ELISA R&D Systems	400-1400 pg/ml	Indipendent t-test or Mann-Whitney U-test Anova	Plasma BDNF levels were significantly lower in the alcohol dependence group (389.5±501.7 pg/ml) than in normal controls (822.5±420.7 pg/ml).
Tae-Suk Kim/Neuroscience Letters 31:78-85 (2007).	Smokers	Non smokers 20 Smokers 20	Males Age 32-46 BMI 20-27Kg/m2 All smokers had smoked at least five cigarettes per day for nine or more years. None of the subjects were taking medication at the time of the study. All smokers met DSM-IV criteria for current nicotine dependence.	Blood was collected in fasting condition between 8:00 and 9:00 AM into lithium heparin vacuum tube.	Blood was immediately centrifuged for 10 minutes at 3800 rpm.	-70°C	ELISA R&D Systems	20-4000 pg/ml	Non parametric Mann-Whitney test Anova	The mean plasma BDNF levels of the smokers (502.3±427.3 pg/ml) were significantly lower than in non smokers (775.4±446.1 pg/ml). After 2 months of smoking cessation, smokers BDNF levels significantly increase (from 423.1±302.6 to 1301.1±140.2 pg/ml).
Di Lazzaro/Neuroscience Letters 423:53-57 (2007).	Acute stroke	PT 10	Patients with first-ever stroke.	Blood was collected at the arrival of patients at the stroke unit and every day at 8 AM for the following 4 days.	Blood was centrifuged for 20 minutes at 2000xg.	-20°C	ELISA R&D Systems	4900-5200 pg/ml	Wilcoxon's Matched-pair test Spearman test	There is no significant increase in endogenous extracellular BDNF after a stroke in humans.
Golden/Plos ONE 5 (2010) e10099.	Cardiovascular disease and metabolic syndrome	PT 496	Aged subjects (70-72) with no long-term chronic disease, severe allergies, or uncontrolled medical conditions.	Blood was collected in fasting condition in the morning.	Blood was centrifuged at 4°C for 30 minutes at 3000 rpm.	-80°C	ELISA Promega	600-800 pg/ml	Linear regression analysis	Plasma BDNF significantly correlates with multiple risk factors for metabolic syndrome and cardiovascular dysfunction.
Vutskits/Neurochemical Research 33:1325-1331 (2008).	Minor surgery	PT 26	Patients underwent elective lumbar or cervical disc herniation surgery	Blood was collected into heparin-coated tubes and put immediately on ice.	Blood was centrifuged at 4°C for 15 minutes at 2000xg.	-80°C	ELISA R&D Systems	100-1000 pg/ml	Non parametric Mann-Whitney test Anova	BDNF levels in plasma are influenced by the anesthetic technique and, possibly, by the duration of surgery.
Monteleone/Journal of Assisted Reproduction and Genetics 24:477-480 (2007).	Ovaric stimolation	PT 23	Females Age 30-38 BMI 19.3-24.45 Kg/m2.	Blood was collected between 8:00 and 9:00 AM and kept on ice.	Blood was immediately centrifuged at 4°C for 15 minutes at 2500xg.	-80°C	ELISA Promega	320-830 pg/ml	T-text	Plasma BDNF exhibits dynamic changes during controlled ovarian stimulation for IVF.
Begliuomini/Human Reproduction 22:995-1002 (2007).	Influence of endogenous and exogenous sex hormones on plasma BDNF	PT 60	20 fertile ovulatory women 15 amenorrhoeic women 25 postmenopausal women.	Blood was collected between 7:30 and 9:00 AM in EDTA-coated tubes.	Blood was immediately centrifuged at 4°C for 15 min at 2500xg.	-80°C	ELISA Promega	240-1200 pg/ml	Bonferroni test Pearson index	In fertile women, luteal phase levels of plasma BDNF (1150 pg/ml) were significantly higher than follicular phase levels (290 pg/ml). Amenorrhoeic subjects, as well as postmenopausal women, showed significantly lower plasma BDNF levels compared with fertile females.
Lommatzsch/Neurobiology of Aging 26:115-123 (2005).	Correlation BDNF-age- weight-gender	140	Age 20-60 Healthy Non allergic.	Blood was collected into heparin-coated tubes.	Blood was centrifuged at 4°C for 15 minutes at 2000xg.	-80°C	ELISA R&D Systems	10-900 pg/ml	Spearman's correletion coefficient, Mann-Whitney test	BDNF levels in plasma decrease significantly with increasing age or weight.
Serra-Millàs M/Psychopharmacology (Berl). 216:1-8 (2011).	Depression	NC 14 PT 18	NC age 23-55; PT age 18-65. Healthy subjects with no history of chronic physical illness, substance abuse or mental diseases and not taking regular medications in the last month	Blood was collected into citrate/phosphate/dextrose at a final citrate concentration of 19 mM. Blood extractions were performed between 9 and 10 a.m.	Plasma poor in platelet (PPP-BDNF) were obtained by centrifugation of citrated blood at 2200 rpm (15 min, 22°C).	-20°C	ELISA Promega	496-132 pg/ml	The variables PPP-BDNF and platelets-BDNF levels have been tested respectively with the Kolmogorov–Smirmov test. One-way non parametric Mann-Whitney test Anova test, and Student's t test for paired data was used for comparisons between two different conditions	Untreated depressed patients showed increased plasma BDNF levels and decreased platelet BDNF levels as compared with control subjects, and tend to normalize during treatment with S-citalopram for 24 weeks, with BDNF reaching levels similar to those in healthy controls at the 24th week in both samples.
Barbosa IG/Neurosci Lett. 475:95-8 (2010).	Bipolar Disorder	NC 38 PT 53	Control:42.9 ± 9.7; BD patients Mania 49.6 ± 14.2; Euthymia 44.5 ± 10.9	Blood was collected into a vacuum tube containing heparin	Blood was immediately centrifuged twice at 3000 × g for 10 min.	-70°C	ELISA R&D Systems	NOT REPORTED	χ2-test or Fisher's, Kolmogorov–Smirnov test, Mann–Whitney, one-way, non parametric Mann-Whitney test Anova or Kruskal–Wallis test	Plasma BDNF levels were significantly increased in BD patients with mania (P ≤ 0.001) and euthymia (P ≤ 0.001) when compared with controls, but did not correlate with any clinical parameters. BDNF concentration was higher in BD patients with 10 or more years of disease.
Zanardini R/Alcohol Clin Exp Res. 2011 Apr 4.	Alcohol Dependence	NC 37 PT 37	NOT REPORTED	Blood was collected into in EDTA-coated tubes.	Plasma tubes were immediately centrifuged at 1,620×g for 15 minutes	-80°C	ELISA R&D Systems	NOT REPORTED	Mann-Whitney test	The mean BDNF plasma levels between patients and controls were not significantly different.
Bocchio-Chiavetto/ The World Journal of Biological Psychiatry 11:763-773 (2010).	Depression	NC 59 PT 25	Depressed patients included in the study were assessed by interview using the Schedules for Clinical Assessment in Neuropsychiatry, as having depression as defined by the ICD-10 or DSM-IV. The Montgomery-Asberg Depression Rating Scale was administered at the baseline to assess severity of illness. Only treatment with benzodiazepines was allowed. The normal controls are a group of volunteeres with…	Blood was collected between 8:00 and 9:00 AM in in anticoagulant-free tubes after overnight fast.	Plasma tubes were immediately centrifuged 3000 rpm for 15 min.	-80°C	ELISA R&D systems	NOT REPORTED	Student t test	The BDNF plasma levels were not significantly different between patients and controls.
